# Supplementary material
Source: publisher figshare collection journal article supplement (https://tandf.figshare.com/articles/dataset/_/1483479)
Supplement: Supplementary file 1 [file 4]

# **Supplementary Materials**

## **The multicopy sRNA LhrC controls expression of the oligopeptide-binding protein OppA in *Listeria monocytogenes***

Susanne Sievers<sup>a,b,#</sup>, Anja Lund<sup>a,#</sup>, Pilar Menendez-Gil<sup>a</sup>, Aaraby Nielsen<sup>a</sup>, Maria Storm Mollerup<sup>a</sup>, Stine Lambert Nielsen<sup>a</sup>, Pernille Buch Larsson<sup>a</sup>, Jonas Borch-Jensen<sup>a</sup>, Jörgen Johansson<sup>c</sup> and Birgitte Haahr Kallipolitis<sup>a,\*</sup>

### **This file contains:**

Supplementary Figure S1

Supplementary Figure S2

Supplementary Figure S3

Supplementary Table S2

Supplementary Table S4

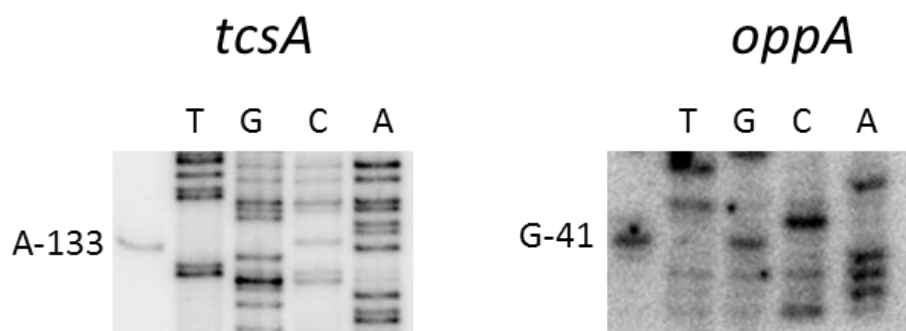

**Supplementary Figure S1.** Primer extension analysis of *tcsA* and *oppA*. The transcriptional start sites were mapped to -133 and -41, respectively, relative to the translational start-sites (+1).

### LhrC1-*tcsA* mRNA

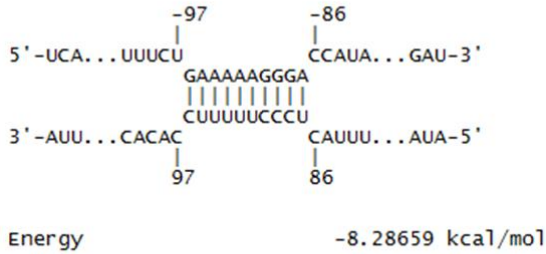

### LhrC2-*tcsA* mRNA

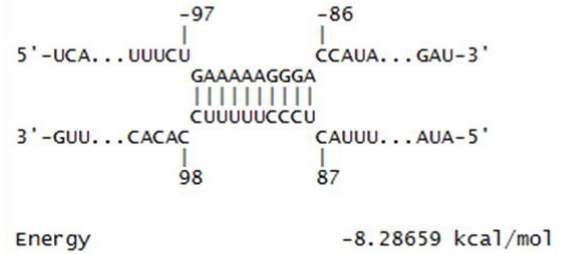

### LhrC3-*tcsA* mRNA

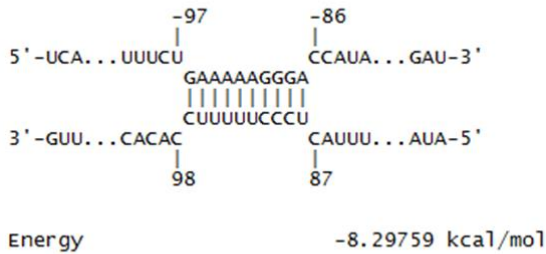

### LhrC4-*tcsA* mRNA

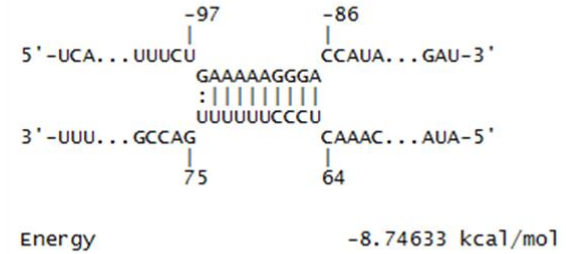

### LhrC5-*tcsA* mRNA

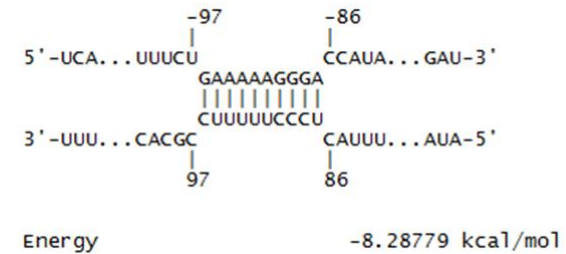

**Supplementary Figure S2.** Predicted interactions between LhrC1-5 and *tcsA* mRNA. The *tcsA* mRNA sequence is shown on top, whereas sequences for LhrC1-5 are shown below. For *tcsA* mRNA, an AG-rich region far upstream from the translational start-site (+1) is predicted to interact with LhrC1-5. For LhrC1-3 and LhrC5, the predicted interactions involve the CU-rich terminator loop, whereas for LhrC4, the single-stranded stretch is predicted to bind *tcsA* mRNA.

-20 -9  
 -AUU...AAAUA AAAAAAGGGAG GUCUA...AUC-3'  
 UUUUUCCCCU  
 -AUU...ACCAG AAACC...AUA-5'  
 71 60

5'-AUU...AAAUA-20  
 AAAAAGGGAG-9  
 GUCUA...AUC-3'  
 3'-GUU...ACCAG-72  
 UUUUCCUC-61  
 AAACC...AUA-5'

5' - AUU... AAAUA <sup>-20</sup> <sup>-9</sup> GUCUA... AUC - 3'  
 AAAAAGGGAG  
 |||||  
 3' - GUU... ACCAG <sub>72</sub> <sub>61</sub> AAACC... AUA - 5'  
 UUUUUCCTUC

5'-AUU...AAAAA-22  
 UAAAAAGGGAG-9  
 GUCUA...AUC-3'  
 3'-UUU...AGCCA-76  
 GUUUUUUCCUC-63  
 AAACC...AUA-5'

5' - AUU...AAUA <sup>-20</sup>  
 AAAAAAGGGAG <sup>-9</sup> GUCUA...AUC - 3'  
 |||||  
 3' - UUU...ACGCC <sub>96</sub>  
 UUUUUCCTUC <sub>85</sub> AUUUG...AUA - 5'

4

**Supplementary Table S2.** RT-qPCR results of *L. monocytogenes*  $\Delta$ *lhrC1-5* + cefuroxime vs. wild type + cefuroxime in comparison with microarray data. Replicate A and B originate from two biologically independent experiments each performed in technical duplicates. Microarray data are the average of three independent experiments.

| <b>Gene</b>                       | <b>Replicate A</b> | <b>Replicate B</b> | <b>Average A+B</b> | <b>Microarray</b> |
|-----------------------------------|--------------------|--------------------|--------------------|-------------------|
| <i>Imo2210</i>                    | 2.37               | 2.11               | <b>2.24</b>        | <b>1.56</b>       |
| <i>Imo0947</i>                    | 12.31              | 14.96              | <b>13.64</b>       | <b>3.07</b>       |
| <i>Imo0948</i>                    | 3.69               | 2.74               | <b>3.22</b>        | <b>2.39</b>       |
| <i>Imo1388</i><br>( <i>tcsA</i> ) | 3.69               | 1.53               | <b>2.61</b>        | <b>1.50</b>       |
| <i>Imo1378 (lisK)</i>             | 5.43               | 4.91               | <b>5.17</b>        | <b>1.34</b>       |
| <i>Imo2124</i>                    | 1.59               | 1.71               | <b>1.65</b>        | <b>0.91</b>       |
| <i>Imo2672</i>                    | 0.52               | 0.61               | <b>0.57</b>        | <b>0.72</b>       |
| <i>Imo1299 (glnA)</i>             | 0.72               | 0.62               | <b>0.67</b>        | <b>0.71</b>       |
| <i>Imo0961</i>                    | 0.60               | 0.86               | <b>0.73</b>        | <b>0.71</b>       |
| <i>Imo1329 (ribC)</i>             | 0.72               | 1.03               | <b>0.87</b>        | <b>1.09</b>       |

**Supplementary Table S4.** Primers used in this study.

| Name                                                    | Sequence (5'→3')                                                              | Further information                                                                                                             |
|---------------------------------------------------------|-------------------------------------------------------------------------------|---------------------------------------------------------------------------------------------------------------------------------|
| <b><i>NB probes</i></b>                                 |                                                                               |                                                                                                                                 |
| F_probe_tcsA_NB                                         | GACCGTTCGTTTAACCAATCAG                                                        | Agarose NB, tcsA, forward primer                                                                                                |
| R_probe_tcsA_NB                                         | GTAGTCTGCTTCAGAAGCTG                                                          | Agarose NB, tcsA, reverse primer                                                                                                |
| F_probe_2196_NB                                         | GAGATATCGTAGCTGGCAAG                                                          | Agarose NB, oppA, forward primer                                                                                                |
| R_probe_2196_NB                                         | GGAATGCGAATAGTGAGTTAATG                                                       | Agarose NB, oppA, reverse primer                                                                                                |
| lhrC_probe                                              | AAAAGGAGTTGGATTTTCATTCT                                                       | Agarose NB. Single stranded probe for LhrC.                                                                                     |
| 16S agarose NB F                                        | GTGCATTAGCTAGTTGGTAG                                                          | Agarose NB, 16S, forward primer                                                                                                 |
| 16S agarose NB R                                        | CAACAGTACTTTACGATCCG                                                          | Agarose NB, 16S, reverse primer                                                                                                 |
| <b><i>transcriptional and translational fusions</i></b> |                                                                               |                                                                                                                                 |
| EcoRI_F_lmo2351_promotor                                | GGGGAATTCTCTGCTGCGCGTTG<br>AAAAC                                              | Forward primer, transcriptional fusion of lmo2351 promoter in pTCV-lac.                                                         |
| BamHI_R2_lmo2351_promotor                               | CCCCGGATCCTATAAACTTACTTG<br>GTTTTTGG                                          | Reverse primer, transcriptional fusion of lmo2351 promoter in pTCV-lac                                                          |
| EcoRI_F_plhrA_tcsA                                      | GGGGGAATTCCTTGCTTTTTTCAA<br>GAACAATAGTAAAATAAGTTACAG<br>TTGGAGAAGACGTAAATG    | Forward primer, translational fusion of LhrA core promoter + tcsA (from -134 to +53 relative to translational start) in pCK-lac |
| BamHI_R_tcsA_promotor                                   | CCCCGGATCCACGCCAGAAGCAA<br>TAATCATTG                                          | Reverse primer, translational fusion of LhrA core promoter + tcsA (from -134 to +53 relative to translational start) in pCK-lac |
| EcoRI_FW_plhrA_2196                                     | GGGGGAATTCCTTGCTTTTTTCAA<br>GAACAATAGTAAAATAAGTTATAGT<br>ATCGAAACAATTTTTCAGAA | Forward primer, translational fusion of LhrA core promoter + oppA (from -46 to +32 relative to translational start) in pCK-lac  |
| BamHI_R_2196                                            | CCCCGGATCCCCAAGTGTAAGAA<br>ATAATTTAG                                          | Reverse primer, translational fusion of LhrA core promoter + oppA (from -46 to +32 relative to translational start) in pCK-lac  |
| <b><i>Primer</i></b>                                    |                                                                               |                                                                                                                                 |

|                                    |                                               |                                                                                                    |
|------------------------------------|-----------------------------------------------|----------------------------------------------------------------------------------------------------|
| <b>extensions</b>                  |                                               |                                                                                                    |
| F_Primerex_tcsA                    | GAGGATTGCAACTAACTTGATTG                       | Forward primer, <i>tcsA</i> sequencing ladder                                                      |
| Rev_BamHI_tcsA                     | CCCCGGATCCGATAGTGCTAAAGCAAATG                 | Reverse primer, sequencing ladder. 5'-end mapping of <i>tcsA</i> transcript                        |
| F lmo2196 til PE                   | CATTCTTCACCTCTAATAAAATTC                      | 5'-end mapping of <i>oppA</i> transcript                                                           |
| R lmo2196 til PE                   | GTGTAAGAAATAATTTAGATTTTTT CAC                 | Reverse primer, sequencing ladder. 5'-end mapping of <i>oppA</i> transcript                        |
| <b>RT-qPCR</b>                     |                                               |                                                                                                    |
| lmo0947_F                          | TCAGCAATTACTTGTTGGAAT                         | Forward primer                                                                                     |
| lmo0947_R                          | CATAGATAATGATAGCGATGGATAA                     | Reverse primer                                                                                     |
| lmo0948_F                          | AATATAGACAACAATGCCAACT                        | Forward primer                                                                                     |
| lmo0948_R                          | GACATACATATCTAACAACAAATC G                    | Reverse primer                                                                                     |
| lmo2210_F                          | TTAATGATAGGGAAGATGAGAAAC                      | Forward primer                                                                                     |
| lmo2210_R                          | TGATAGGTGCTGCTGTAAT                           | Reverse primer                                                                                     |
| lmo1388_tscA_F                     | GCTTCTGGCGTTATCCTA                            | Forward primer                                                                                     |
| lmo1388_tscA_R                     | TCTGTAACCATTGCTACTGTA                         | Reverse primer                                                                                     |
| lmo1378_lisK_F                     | TGTTAGCGGTACAGATAAGT                          | Forward primer                                                                                     |
| lmo1378_lisK_R                     | TTATAGGAAGTGAGCGGATT                          | Reverse primer                                                                                     |
| lmo2124_F                          | GGAGCAGGACATTAGGTAT                           | Forward primer                                                                                     |
| lmo2124_R                          | ATAGTAATTCCAATAGCGATAGC                       | Reverse primer                                                                                     |
| lmo1329_ribC_F                     | ATGGCGAGTATTGGCTAT                            | Forward primer                                                                                     |
| lmo1329_ribC_R                     | TTCTGCTTCTTCTCCGTAA                           | Reverse primer                                                                                     |
| lmo0961_F                          | AGAAGGTGCTGGTGAATT                            | Forward primer                                                                                     |
| lmo0961_R                          | TGTGGATAAGTGTACTGGTAA                         | Reverse primer                                                                                     |
| lmo2672_F                          | GGACTTGACTGGTAGCAT                            | Forward primer                                                                                     |
| lmo2672_R                          | CATTCAGCAAACCTCTCTT                           | Reverse primer                                                                                     |
| lmo1299-F                          | TTCTTAGCAGGGATGTTGA                           | Forward primer                                                                                     |
| lmo1299_R                          | CTGACCACGCAATGTAAC                            | Reverse primer                                                                                     |
| tpi_fw                             | AACACGGCATGACACCAATC                          | Forward primer                                                                                     |
| tpi_rev                            | CACGGATTTGACCACGTACC                          | Reverse primer                                                                                     |
| rpoB_fw                            | CGTCGTCTTCGTTCTGTTGG                          | Forward primer                                                                                     |
| rpoB_rev                           | GTTACGAACCACACGTTCC                           | Reverse primer                                                                                     |
| <b>EMSA and structural probing</b> |                                               |                                                                                                    |
| FW_lmo2196_in_v itro               | GGGGTAATACGACTCACTATAGG GAAACAATTTTTCAGAAAAAT | Forward primer, synthesis of <i>oppA</i> DNA with T7 promoter to be transcribed into RNA; also for |

|                          |                                                                                                            |                                                                                                                                                            |
|--------------------------|------------------------------------------------------------------------------------------------------------|------------------------------------------------------------------------------------------------------------------------------------------------------------|
| Reverse_lmo2196_in_vitro | CAAGACTAAGCTTAGTAATA                                                                                       | structural probing.<br>Reverse primer, synthesis of oppA DNA with T7 promoter to be transcribed into RNA; also for structural probing.                     |
| T7_fw_tcsA               | GGGGTAATACGACTCACTATAGG<br>GAGTTGGAGAAGACGTTAAATGTT<br>T                                                   | Forward primer, synthesis of tcsA DNA with T7 promoter to be transcribed into RNA.                                                                         |
| rev_tcsA_gelskift        | GATAGTGCTAAAGCAAATGTACG                                                                                    | Reverse primer, synthesis of tcsA DNA with T7 promoter to be transcribed into RNA.                                                                         |
| T7_lhrC4_fw              | GGGGGAATTCTAATACGACTCACT<br>ATAGGGATAAGCTAACAACAAACA<br>AAACATTTTCATTCTTCTCCCCCCT<br>TTAGAATGAAAATCCC      | Forward primer, synthesis of lhrC4 DNA with T7 promoter to be transcribed into RNA; also for structure probing; PCR with overlapping primers (no template) |
| T7_lhrC4_rev             | GGGGGGATCCAAAAAACCAGATG<br>CGGAAAAGGGAGTAAACCGCATC<br>GGTCAAAAAGGGAGTTTGGGATT<br>TTCATTCTAAAAGGGG          | Reverse primer, synthesis of lhrC4 DNA with T7 promoter to be transcribed into RNA; also for structure probing; PCR with overlapping primers (no template) |
| lhrC4_mut_2_fw           | GGGGGAATTCTAATACGACTCACT<br>ATAGGGATAAGCTAACAACAAACA<br>AAACATTTTCATTCTTCTCCCCCCT<br>TTAGAATGAAAATAGAACAG  | Forward primer, use with overlapping lhrC4_mut_2_rev primer                                                                                                |
| lhrC4_mut_2_rev          | GGGGGGATCCAAAAAACCAGATG<br>CGGAAAAGGGAGTAAACCGCATC<br>GGTCGGGGTTCCTTCTGTTCTATT<br>TTCATTCTAAAAG            | Reverse primer, use with overlapping lhrC4_mut_2_fw primer                                                                                                 |
| lhrC4_mut_3_fw           | GGGGGAATTCTAATACGACTCACT<br>ATAGGGATAAGCTAACAACAAACA<br>AAACATTTTCATTCTTCTCCCCCCT<br>TTAGAATGAAAATCCCAAAC  | Forward primer, use with overlapping lhrC4_mut_3_rev primer                                                                                                |
| lhrC4_mut_3_rev          | GGGGGGATCCAAAAAACCAGATG<br>CGGTTTTCCCTCTAGTCCGCATCG<br>GTCAAAAAGGGAGTTTGGGATT<br>TCATTCTAAAAG              | Reverse primer, use with overlapping lhrC4_mut_3_fw primer                                                                                                 |
| lhrC4_mut_4_fw           | GGGGGAATTCTAATACGACTCACT<br>ATAGGGATAAGCTAACAACAAACA<br>AAACATTTTCATTCTAATGGCGGG<br>AAAAAGAATGAAAATCCCAAAC | Forward primer, use with overlapping lhrC4_mut_4_rev primer                                                                                                |
| lhrC4_mut_4_rev          | GGGGGGATCCAAAAAACCAGATG                                                                                    | Reverse primer, use with                                                                                                                                   |



|                                   |                                                                                                            |                                                                                      |
|-----------------------------------|------------------------------------------------------------------------------------------------------------|--------------------------------------------------------------------------------------|
|                                   | CGGAAAAGGGAGTAAACCGCATC<br>GGTCAAAAAGGGAGTTTGGGATT<br>TTCATTCTTTTTTC                                       | overlapping lhrC4_mut_4_fw<br>primer                                                 |
| lhrC4_mut_5_fw                    | GGGGGAATTCTAATACGACTCACT<br>ATAGGGATAAGCTAACAACAAACA<br>AAACATTTTCATTCTTCTCCCCCT<br>TTAGAATGAAAATAGAACAG   | Forward primer, use with<br>overlapping lhrC4_mut_5_rev<br>primer                    |
| lhrC4_mut_5_rev                   | GGGGGGATCCAAAAAAACCGATG<br>CGGTTTTCCCTCTAGTCCGCATCG<br>GTCGGGGTTCCTTCTGTTCTATTT<br>TCATTCTAAAAG            | Reverse primer, use with<br>overlapping lhrC4_mut_5_fw<br>primer                     |
| lhrC4_mut_7_fw                    | GGGGGAATTCTAATACGACTCACT<br>ATAGGGATAAGCTAACAACAAACA<br>AAACATTTTCATTCTAATGGCGGG<br>AAAAAGAATGAAAATAGAACAG | Forward primer, use with<br>overlapping lhrC4_mut_7_rev<br>primer                    |
| lhrC4_mut_7_rev                   | GGGGGGATCCAAAAAAACCGATG<br>CGGTTTTCCCTCTAGTCCGCATCG<br>GTCGGGGTTCCTTCTGTTCTATTT<br>TCATTCTTTTTTC           | Reverse primer, use with<br>overlapping lhrC4_mut_7_fw<br>primer                     |
| Rev_LhrC4_ss_mu<br>t              | AAAAAAACCGATGCGGAAAAGGG<br>AGTAAACCGCATCGGTCAAAAAC<br>GCTGTTTGGGATTTTCATTCTAAAA<br>GGGG                    | Reverse primer for making<br>LhrC4_ss_mut, use in<br>combination with T7_lhrC4_fw.   |
| Rev_LhrC4_ter_mu<br>t             | AAAAAAACCGATGCGGAAAACGCT<br>GTAAACCGCATCGGTCAAAAAGG<br>GAGTTTGGGATTTTCATTCTAAAA<br>GGGG                    | Reverse primer for making<br>LhrC4_ter_mut, use in<br>combination with T7_lhrC4_fw   |
| Rev_LhrC4_combi<br>_mut           | AAAAAAACCGATGCGGAAAACGCT<br>GTAAACCGCATCGGTCAAAAACG<br>CTGTTTGGGATTTTCATTCTAAAAG<br>GGG                    | Reverse primer for making<br>LhrC4_combi_mut, use in<br>combination with T7_lhrC4_fw |
| T7_Fw_Imo2196_<br>mut_overlapping | GGGGTAATACGACTCACTATAGG<br>GAAACAATTTTTCAGAAAAATAAAA<br>AACGCTGGTCTACTTAGTGAAAAA<br>ATC                    | Forward primer, use with<br>overlapping<br>Rev_Imo2196_mut_overlapping               |
| Rev_Imo2196_mut<br>_overlapping   | CAAGACTAAGCTTAGTAATAGTGT<br>TAATCCAAGTGTAAGAAATAATTTA<br>GATTTTTTCACTAAGTAGA                               | Reverse primer, use with<br>overlapping<br>T7_Fw_Imo2196_mut_overlappi<br>ng         |
